# Supplementary material for: Integrated Analysis of Long Non-Coding RNA and mRNA Expression Profiles in Testes of Calves and Sexually Mature Wandong Bulls (Bos taurus)
Source: MDPI journal article supplement (doi:10.3390/ani11072006), 2021-07-05
Supplement: s1 [file s1]

**Table S1.** Scrotal circumference, grass motility threshold and progressive motility were evaluated for the sexually mature bulls.

| Scrotal circumference |    | Gross motility       |           | Progressive motility |           |
|-----------------------|----|----------------------|-----------|----------------------|-----------|
| Age                   | Cm | Motility             | Scoring   | Motility             | Scoring   |
| ≥15 - ≤18             | 31 | Fast swirling        | Excellent | ≥70%                 | Excellent |
| ≥18 - ≤21             | 32 | Slower swirling      | Good      | 50-69%               | Good      |
| ≥21 - ≤24             | 33 | General oscillation  | Fair      | 30-49%               | Fair      |
| >24                   | 34 | Sporadic oscillation | Poor      | ≤30%                 | Poor      |
