# Supplementary material for: Integrated Analysis of Long Non-Coding RNA and mRNA Expression Profiles in Testes of Calves and Sexually Mature Wandong Bulls (Bos taurus)
Source: MDPI journal article supplement (doi:10.3390/ani11072006), 2021-07-05
Supplement: s1 [file s1]

**Table S6.** The top 10 significantly enriched GO descriptions of BP, CC and MF and regulated the targets genes of lnc-RNAs.

| GO ID                       | GO description                                 | Total gene count | Corrected p-value |
|-----------------------------|------------------------------------------------|------------------|-------------------|
| <b>Biological processes</b> |                                                |                  |                   |
| GO:0048518                  | positive regulation of biological process      | 2245             | 2.31E-31          |
| GO:0048522                  | positive regulation of cellular process        | 2004             | 2.11E-29          |
| GO:0048856                  | anatomical structure development               | 2113             | 2.66E-29          |
| GO:0032502                  | developmental process                          | 2268             | 5.73E-26          |
| GO:0007275                  | multicellular organismal development           | 1910             | 1.27E-25          |
| GO:0048731                  | system development                             | 1752             | 1.43E-25          |
| GO:0032501                  | multicellular organismal process               | 2887             | 3.43E-24          |
| GO:0048519                  | negative regulation of biological process      | 1849             | 2.21E-23          |
| GO:0051239                  | regulation of multicellular organismal process | 1226             | 1.29E-21          |
| GO:0048869                  | cellular developmental process                 | 1616             | 1.16E-20          |
| <b>Cellular components</b>  |                                                |                  |                   |
| GO:0044464                  | cell part                                      | 6937             | 2.38E-61          |
| GO:0005575                  | cellular_component                             | 8177             | 4.29E-44          |
| GO:0044424                  | intracellular part                             | 5831             | 7.94E-42          |
| GO:0005622                  | intracellular                                  | 5892             | 5.08E-39          |
| GO:0043226                  | organelle                                      | 5098             | 1.37E-35          |
| GO:0043229                  | intracellular organelle                        | 5081             | 4.57E-35          |
| GO:0005737                  | cytoplasm                                      | 4251             | 7.33E-35          |
| GO:0043231                  | Intracellular membrane-bounded organelle       | 4488             | 6.81E-28          |
| GO:0044444                  | cytoplasmic part                               | 3328             | 3.22E-22          |

|                           |                                                               |      |            |
|---------------------------|---------------------------------------------------------------|------|------------|
| GO:0005634                | nucleus                                                       | 2810 | 2.97E-17   |
| <b>Molecular function</b> |                                                               |      |            |
| GO:0042802                | identical protein binding                                     | 661  | 8.32E-06   |
| GO:0019899                | enzyme binding                                                | 766  | 3.95E-10   |
| GO:0044212                | transcription regulatory region DNA binding                   | 425  | 3.54E-06   |
| GO:0001067                | regulatory region nucleic acid binding                        | 425  | 4.09E-06   |
| GO:0001012                | RNA polymerase II regulatory region DNA binding               | 346  | 1.70E-05   |
| GO:0000976                | transcription regulatory region sequence-specific DNA binding | 364  | 2.04E-05   |
| GO:0008134                | transcription factor binding                                  | 253  | 3.03E-05   |
| GO:0000987                | core promoter proximal region sequence-specific DNA binding   | 232  | 0.00034545 |
| GO:0001159                | core promoter proximal region DNA binding                     | 232  | 0.00034545 |
| GO:0003700                | sequence-specific DNA binding transcription factor activity   | 498  | 0.002096   |
