# Supplementary material for: Integrated Analysis of Long Non-Coding RNA and mRNA Expression Profiles in Testes of Calves and Sexually Mature Wandong Bulls (Bos taurus)
Source: MDPI journal article supplement (doi:10.3390/ani11072006), 2021-07-05
Supplement: s1 [file s1]

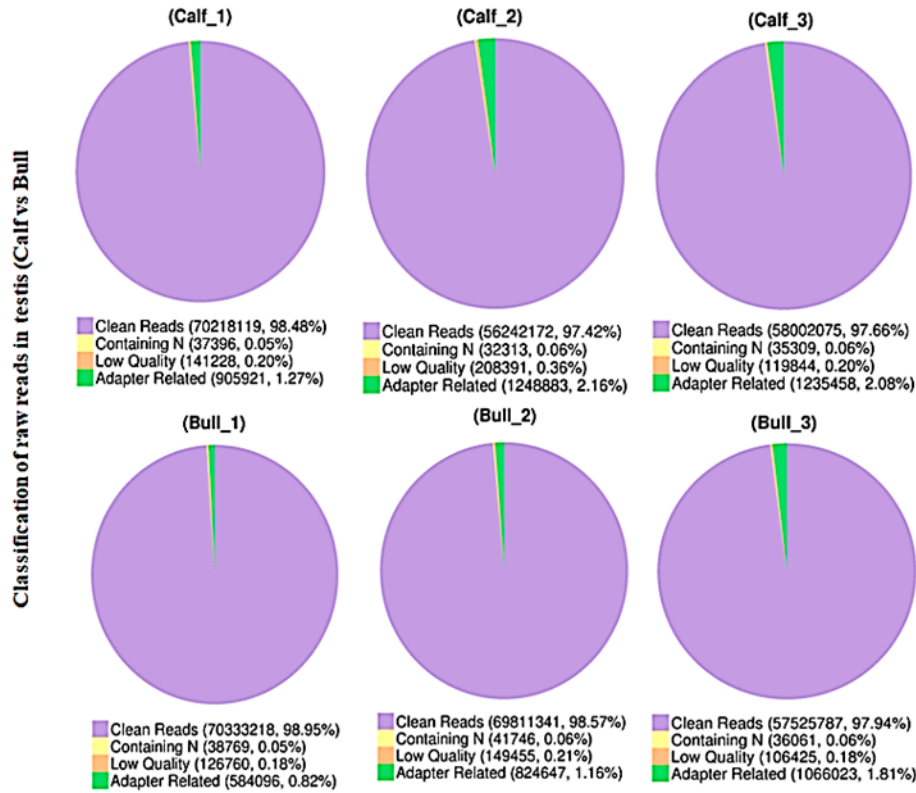

**Figure S5:** Pie charts represent the raw data classification in to different filtering reads in calf and bull, whereas different color ratios represent the proportions of different components.
