# Supplementary material for: Integrated Analysis of Long Non-Coding RNA and mRNA Expression Profiles in Testes of Calves and Sexually Mature Wandong Bulls (Bos taurus)
Source: MDPI journal article supplement (doi:10.3390/ani11072006), 2021-07-05
Supplement: s1 [file s1]

**Table S4:** The top 10 significantly enriched GO description of BP, CC and MF for mRNAs targets genes.

| GO ID                       | GO description                            | Total gene count | Corrected <i>p</i> -<br><i>value</i> |
|-----------------------------|-------------------------------------------|------------------|--------------------------------------|
| <b>Biological processes</b> |                                           |                  |                                      |
| GO:0000003                  | reproduction                              | 405              | 8.26E-15                             |
| GO:0048610                  | cellular process involved in reproduction | 234              | 3.51E-13                             |
| GO:0048232                  | male gamete generation                    | 152              | 3.51E-13                             |
| GO:0019953                  | sexual reproduction                       | 226              | 3.51E-13                             |
| GO:0007283                  | spermatogenesis                           | 151              | 5.04E-13                             |
| GO:0022414                  | reproductive process                      | 335              | 9.37E-13                             |
| GO:0032504                  | multicellular organism reproduction       | 228              | 1.53E-11                             |
| GO:0007276                  | gamete generation                         | 185              | 2.69E-11                             |
| GO:0044702                  | single organism reproductive process      | 254              | 3.39E-11                             |
| GO:0007286                  | spermatid development                     | 69               | 2.47E-10                             |
| <b>Cellular components</b>  |                                           |                  |                                      |
| GO:0097223                  | sperm part                                | 82               | 6.93E-17                             |
| GO:0001669                  | acrosomal vesicle                         | 46               | 8.56E-11                             |
| GO:0005930                  | axoneme                                   | 67               | 9.72E-09                             |
| GO:0036126                  | sperm flagellum                           | 43               | 2.34E-07                             |
| GO:0005929                  | cilium                                    | 168              | 2.78E-06                             |
| GO:0005576                  | extracellular region                      | 628              | 8.30E-06                             |
| GO:0042995                  | cell projection                           | 518              | 1.04E-05                             |
| GO:0031514                  | motile cilium                             | 117              | 0.00016024                           |
| GO:0005780                  | extrinsic to intraperoxisomal membrane    | 19               | 0.0018644                            |
| GO:0030312                  | external encapsulating structure          | 19               | 0.0018644                            |
| <b>Molecular function</b>   |                                           |                  |                                      |

---

|            |                                             |     |            |
|------------|---------------------------------------------|-----|------------|
| GO:0008827 | cytochrome o ubiquinol oxidase activity     | 43  | 0.00012968 |
| GO:0005198 | structural molecule activity                | 268 | 0.00016147 |
| GO:0005179 | hormone activity                            | 60  | 0.0046066  |
| GO:0003777 | microtubule motor activity                  | 47  | 0.0051093  |
| GO:0003916 | DNA topoisomerase activity                  | 35  | 0.0078641  |
| GO:0005215 | transporter activity                        | 474 | 0.011111   |
| GO:0004673 | protein histidine kinase activity           | 14  | 0.012524   |
| GO:0005201 | extracellular matrix structural constituent | 33  | 0.023497   |
| GO:0015077 | monovalent inorganic cation                 | 157 | 0.023752   |
|            | transmembrane transporter activity          |     |            |
| GO:0004672 | protein kinase activity                     | 237 | 0.049041   |

---
