# Supplementary material for: Integrated Analysis of Long Non-Coding RNA and mRNA Expression Profiles in Testes of Calves and Sexually Mature Wandong Bulls (Bos taurus)
Source: MDPI journal article supplement (doi:10.3390/ani11072006), 2021-07-05
Supplement: s1 [file s1]

**Table S2:** Primers used for RT-qPCR validation of m-RNA and lnc-RNAs sequencing data.

| <b>Genes</b>    | <b>Accessions no.</b> | <b>Primers sequence (5'→3')</b>                                    | <b>Product size (bp)</b> |
|-----------------|-----------------------|--------------------------------------------------------------------|--------------------------|
| <i>CCDC83</i>   | NM_001038218.2        | F- AAGAATGTAGGGAGTGAACAGCATGGTA<br>R- TTGTCAATGAACCTTAGAGCATTCTCTG | 206                      |
| <i>DMRTC2</i>   | NM_001038182.2        | F-ACATGCTCAACTCTGATACTCCAG<br>R-AGATGAATCTTTCAGTCCCACAAG           | 163                      |
| <i>HSPA2</i>    | NM_174344.1           | F-CGCTGTGGAGTCCTATACCTATAAC<br>R-CTCTTTCTGCTTGTGTTTCATACTCA        | 175                      |
| <i>IQCG</i>     | NM_001038195.1        | F-ATCCAGTCCATTGGTACATAAAGAA<br>R-TACATCACTCAAAAATTGCCTATCA         | 169                      |
| <i>PACRG</i>    | NM_001077027.2        | F-AAAGAGACCCTGAGATTAAACAAAT<br>R-CTCTCACGACTGAGTTTTTCATCAT         | 162                      |
| <i>SPO11</i>    | NM_001193090.1        | F-TCACTCTGGTAGATGCTGATCCACA<br>R-CATCTGGTCCCGTTTTGTCAGTGGA         | 194                      |
| <i>EHHADH</i>   | NM_001075780.2        | F-TGCCTGCTGCACTTGACTTGATTATCTC<br>R-TGTTGGGCAAGCTCGGGACTGGCATGTT   | 192                      |
| <i>SPPI</i>     | NM_174187.2           | F-GGCATTGCCTCCGCCCTTCCAGTTAAAC<br>R-CATCAGTTTCCTCAGAGGACACAGAATT   | 169                      |
| <i>NSD2</i>     | XM_024993748.1        | F-CTGCTCCAAAGGTGGTGAAGTGCGTGAA<br>R-GCCGTTGAACTTCTGCACGACCCCGTCC   | 170                      |
| <i>ACTN4</i>    | NM_001098052.1        | F-ACCACGCGGCGAACCAGTCGTACCAGTA<br>R-CGGCCTTCCGCAGGTGGGAGTTGCACCA   | 192                      |
| <b>Genes</b>    | <b>Accessions no.</b> | <b>Primers sequence (5'→3')</b>                                    | <b>Product size (bp)</b> |
| <i>COX7A2</i>   | NM_175807.1           | F-CTCCGTCAGATTGCTAAGAGGACCATAA<br>R-ATGGCATATGCCGTTCCACCAACTGTAA   | 175                      |
| <i>COX6B2</i>   | NM_001012684.1        | F-AAATGGCCAACGCCGCCTTTCGACCCGC<br>R-GCTGATGGGGCACAGCGAGTGGTACACG   | 198                      |
| <i>PRM2</i>     | NM_174157.4           | F-GATGCCACGTGAAGAGTCCAAGTAAAG<br>R-CCCTTCTCCGGCGCCTCCGGTAGGGGCG    | 202                      |
| <i>TRIM37</i>   | NM_001110182.1        | F-AGAGTGTGGAGAGCATTGCTGAGGTGTT<br>R-CAAGCGCGCATCCCGCAGTTTCTCCATG   | 196                      |
| <i>INHBA</i>    | NM_174363.2           | F-ACATCTTCCCTGTCTCCAGCTGCATCCA<br>R-CCCCTCCTTCTCCATCCCTCTTCTTCCC   | 165                      |
| <i>ERBB4</i>    | XM_024981515.1        | F-CAAACATTTGTCTACAATCCCACCTACCT<br>R-TGCAAGGTTTACACATTTTAATCCCATT  | 188                      |
| <i>SDHA</i>     | NM_174178.2           | F-TTTCAACACGGCCTGCGTCACGAAGCTC<br>R-GTCCTGGTCCCCCAGCCAGTCGGAGCCT   | 168                      |
| <i>ATP6V0A2</i> | NM_176637.2           | F-CCCTGTTCCGGAGCGAGACCATGTGCCT<br>R-GCACCAAGTATGCCAATATTCGCTCCAG   | 192                      |
| <i>FGF9</i>     | NM_001245926.1        | F-GAACTATTTTCGGCGTGCAGGATGCGGTG<br>R-TCCTGCAGTACAGCTGCCTCCGCCTGAG  | 166                      |
| <i>TCF21</i>    | NM_001014899.1        | F-AGAGATGTGGAGGATCTTCAAGAGGTGG<br>R-AGGGGCTCTTCTTGGTGGGTGCCTTCCT   | 174                      |
