# Supplementary material for: Integrated Analysis of Long Non-Coding RNA and mRNA Expression Profiles in Testes of Calves and Sexually Mature Wandong Bulls (Bos taurus)
Source: MDPI journal article supplement (doi:10.3390/ani11072006), 2021-07-05
Supplement: s1 [file s1]

**Table S5.** The top 10 most significant enriched pathways regulated by mRNAs in the *bovine* testes development

| Terms                                       | Source<br>genes | Total genes | P-value           | Corrected P-value |
|---------------------------------------------|-----------------|-------------|-------------------|-------------------|
| <b>Adherens junction</b>                    | 59              | 68          | 1.31296794924e-10 | 3.59753218092e-08 |
| <b>Cell adhesion molecules<br/>(CAMs)</b>   | 94              | 154         | 7.94775346314e-10 | 1.08884222445e-07 |
| <b>Ribosome</b>                             | 67              | 136         | 4.56937630365e-05 | 0.00417336369066  |
| <b>ECM-receptor interaction</b>             | 47              | 85          | 7.76067129299e-05 | 0.0053160598357   |
| <b>Amoebiasis</b>                           | 58              | 117         | 0.000125213236461 | 0.00686168535808  |
| <b>Lysine degradation</b>                   | 31              | 54          | 0.000756358938021 | 0.034540391503    |
| <b>Morphine addiction</b>                   | 45              | 93          | 0.0009887455281   | 0.038702324957    |
| <b>Protein digestion and<br/>absorption</b> | 41              | 83          | 0.00119694229053  | 0.0409952734505   |
| <b>Calcium signaling pathway</b>            | 76              | 188         | 0.00166638615186  | 0.0507322006233   |
| <b>Gap junction</b>                         | 42              | 89          | 0.00205415390132  | 0.0562838168962   |
