# Supplementary material for: Integrated Analysis of Long Non-Coding RNA and mRNA Expression Profiles in Testes of Calves and Sexually Mature Wandong Bulls (Bos taurus)
Source: MDPI journal article supplement (doi:10.3390/ani11072006), 2021-07-05
Supplement: s1 [file s1]

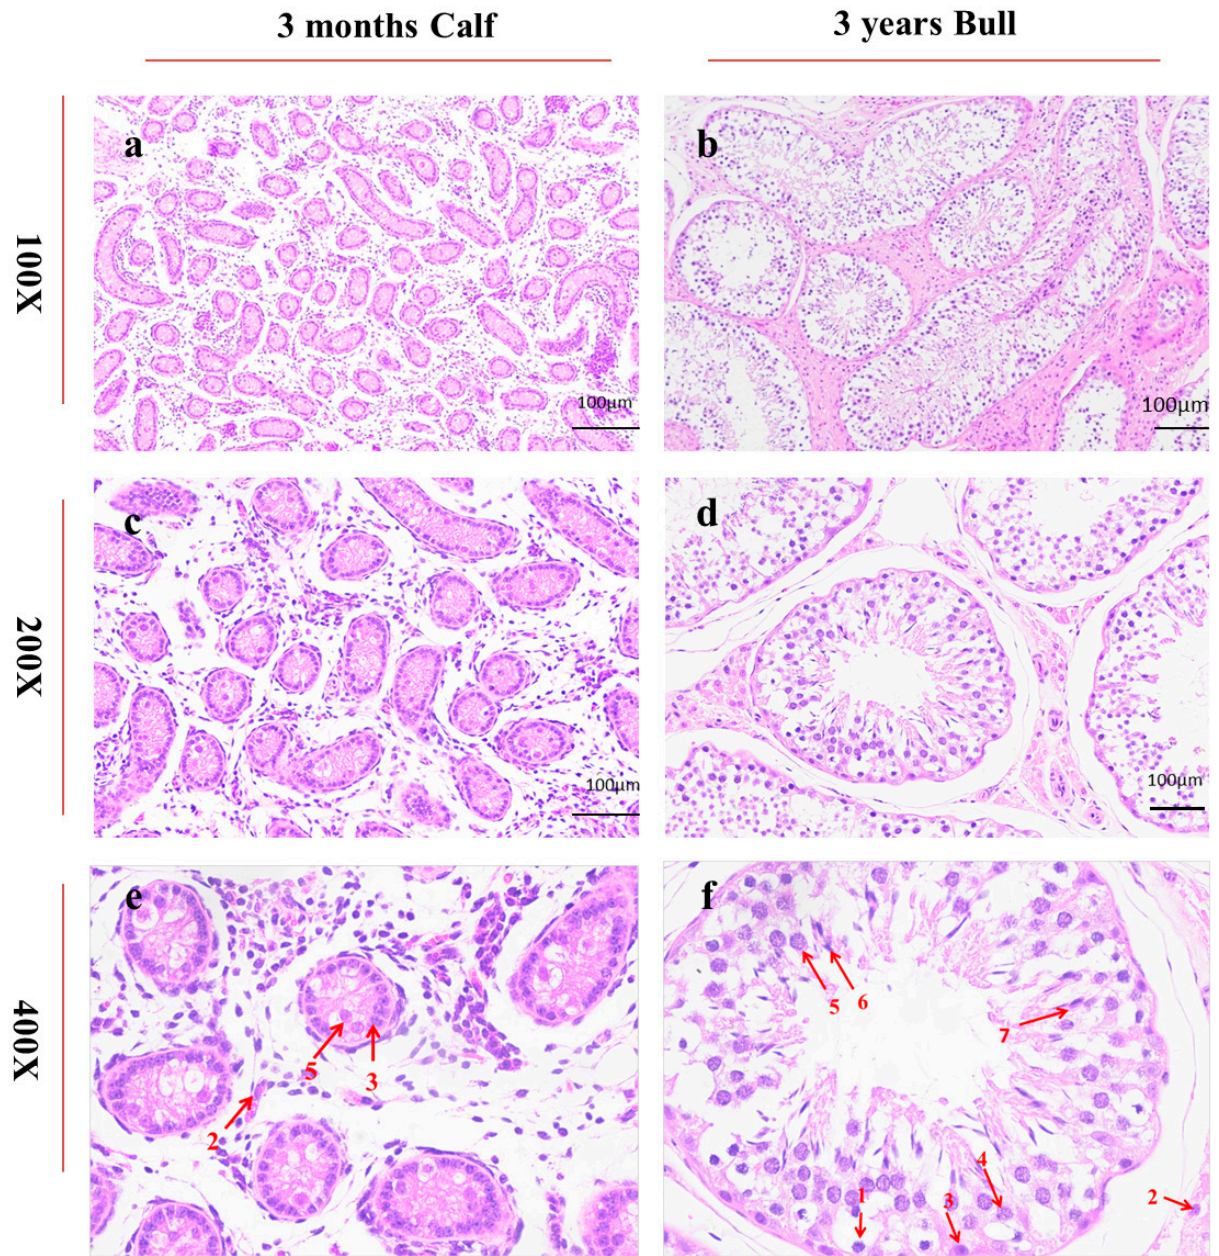

**Figure S4:** The histomorphological analysis of bull testicular tissues at three months and three years ages were observed under microscope at  $\times 100$ ,  $\times 200$ , and  $\times 400$  magnifications. Bars = 100  $\mu\text{m}$ . The segments (a), (c) and (e) represent the morphology of 3-month-old testes, whereas (b) (d), and (f) represents the morphology of 3 years bulls. The red arrows indicate different cells types. 1: spermatogonia, 2: Leydig cells, 3: Sertoli cells, 4: spermatocytes, 5: round spermatids, 6: elongated spermatids, 7: sperm.
