# Supplementary material for: Integrated Analysis of Long Non-Coding RNA and mRNA Expression Profiles in Testes of Calves and Sexually Mature Wandong Bulls (Bos taurus)
Source: MDPI journal article supplement (doi:10.3390/ani11072006), 2021-07-05
Supplement: s1 [file s1]

**Table S7.** The top 10 most significant enriched pathways regulated by lncRNAs in the bovine testes development.

| Terms                              | Source<br>genes | Total genes | P-value           | Corrected P-value |
|------------------------------------|-----------------|-------------|-------------------|-------------------|
| Ribosome                           | 128             | 136         | 3.34531311959e-08 | 9.23306421006e-06 |
| RNA transport                      | 100             | 160         | 0.0210989062546   | 0.948336203948    |
| Ubiquitin mediated proteolysis     | 86              | 138         | 0.031823016206    | 0.948336203948    |
| Hippo signaling pathway            | 93              | 151         | 0.0321007421888   | 0.948336203948    |
| Glycerophospholipid<br>metabolism  | 59              | 91          | 0.0417342824061   | 0.948336203948    |
| Fructose and mannose<br>metabolism | 25              | 32          | 0.0450948671249   | 0.948336203948    |
| TGF-beta signaling pathway         | 52              | 79          | 0.045248655271    | 0.948336203948    |
| Lysine degradation                 | 37              | 54          | 0.0580794954844   | 0.948336203948    |
| Huntington's disease               | 112             | 194         | 0.062710184272    | 0.948336203948    |
| Spliceosome                        | 77              | 130         | 0.0781095127538   | 0.948336203948    |
