# Supplementary material for: Integrated Analysis of Long Non-Coding RNA and mRNA Expression Profiles in Testes of Calves and Sexually Mature Wandong Bulls (Bos taurus)
Source: MDPI journal article supplement (doi:10.3390/ani11072006), 2021-07-05
Supplement: s1 [file s1]

**Table S3:** Raw data quality summary of calves and bulls testes sequencing data.

| Sample_name | Raw_reads | Clean_reads | Raw_bases<br>(G) | Clean_bases<br>(G) | Error<br>rate(%) | Q20(%) | Q30(%) | GC_content(%) |
|-------------|-----------|-------------|------------------|--------------------|------------------|--------|--------|---------------|
| Bull_1      | 142165686 | 140666436   | 21.32            | 21.10              | 0.03             | 97.40  | 92.90  | 52.53         |
| Bull_2      | 141654378 | 139622682   | 21.25            | 20.94              | 0.03             | 97.42  | 92.94  | 51.48         |
| Bull_3      | 117468592 | 115051574   | 17.62            | 17.26              | 0.03             | 97.38  | 92.87  | 51.98         |
| Calf_1      | 142605328 | 140436238   | 21.39            | 21.07              | 0.03             | 97.50  | 93.11  | 53.57         |
| Calf_2      | 115463518 | 112484344   | 17.32            | 16.87              | 0.03             | 97.23  | 92.64  | 53.34         |
| Calf_3      | 118785371 | 116004150   | 17.82            | 17.40              | 0.03             | 97.25  | 92.53  | 47.09         |
