# Supplementary figures and images for: Integrated Analysis of Long Non-Coding RNA and mRNA Expression Profiles in Testes of Calves and Sexually Mature Wandong Bulls (Bos taurus)
Source: MDPI journal article supplement (doi:10.3390/ani11072006), 2021-07-05

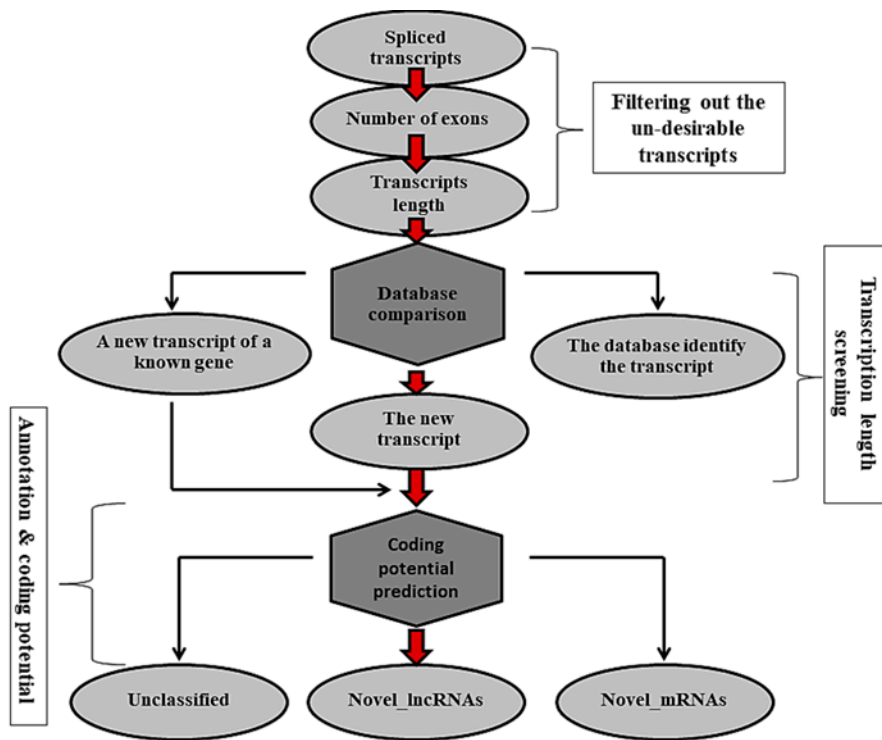

**Figure S3.** The different steps are involved in screening of novel lnc-RNAs and mRNAs.

Supplement: s1 [file s1]

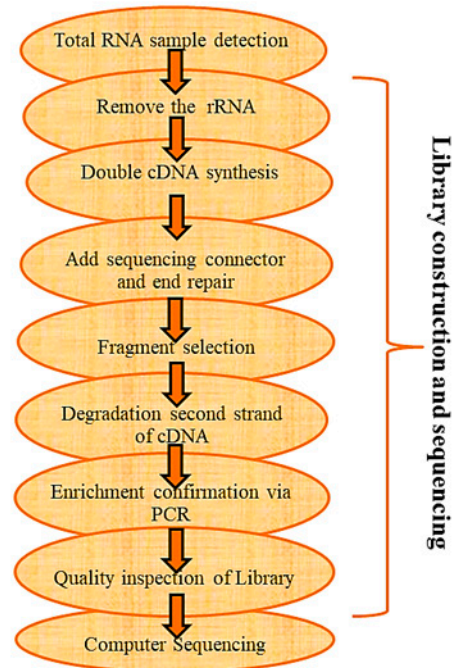

**Figure S2:** Flow chart was adopted for cDNA library construction, and quality inspection.

Supplement: s1 [file s1]
